# Supplementary material
Source: Royal Society of Chemistry journal article supplement (doi:10.1039/d6ta00695g)
Supplement: d6ta00695g1.pdf [file d6ta00695g1.pdf]

## Supporting Information

### **Hexameric Structure-Dependent Catalysis of Oxalate Oxidase for Mitigating Shuttle Effect in High-Temperature Li-S Batteries**

Tao Yang,<sup>a</sup> Peihang Li,<sup>b</sup> Yingxue Mei,<sup>a</sup> Dong Cai,<sup>b</sup> Chongju Chen,<sup>a</sup> Shuo Yang<sup>\*a</sup> and Zhi Yang<sup>\*b</sup>

a. College of Electrical and Electronic Engineering, Wenzhou University, Wenzhou, 325035, China

b. Key Laboratory of Carbon Materials of Zhejiang Province, Wenzhou University, Wenzhou, 325035, China

\* E-mail: yangshuo@wzu.edu.cn (S.Y.), yang201079@126.com (Z.Y.)

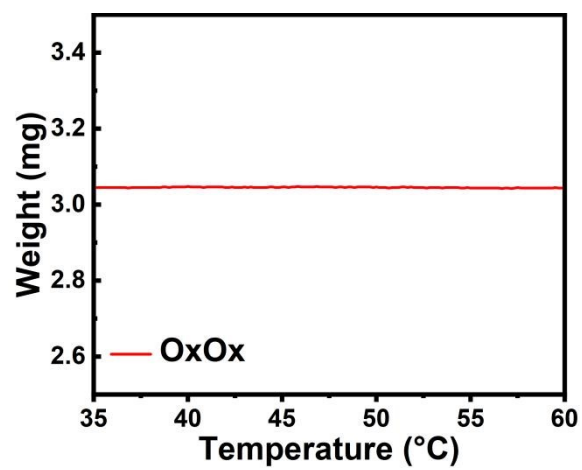

**Fig. S1** TGA results of OxOx. Weight vs. temperature from 35 to 60°C.

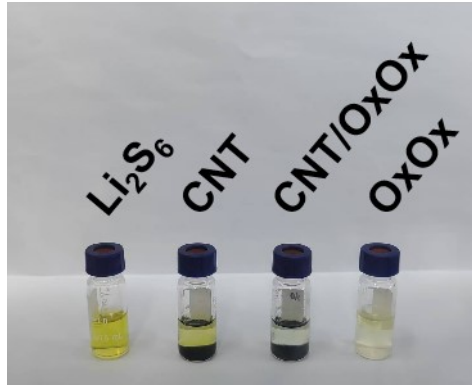

**Fig. S2** Photographs of different materials in  $\text{Li}_2\text{S}_6$  solutions.

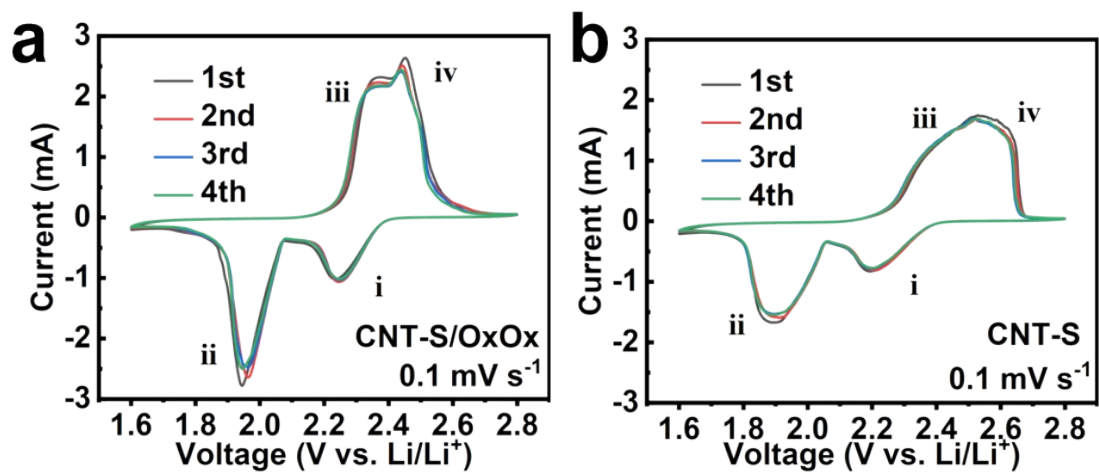

**Fig. S3** CV curves of (a) CNT-S/OxOx and (b) CNT-S and cathodes at a scan rate of 0.1 mV s<sup>-1</sup>.

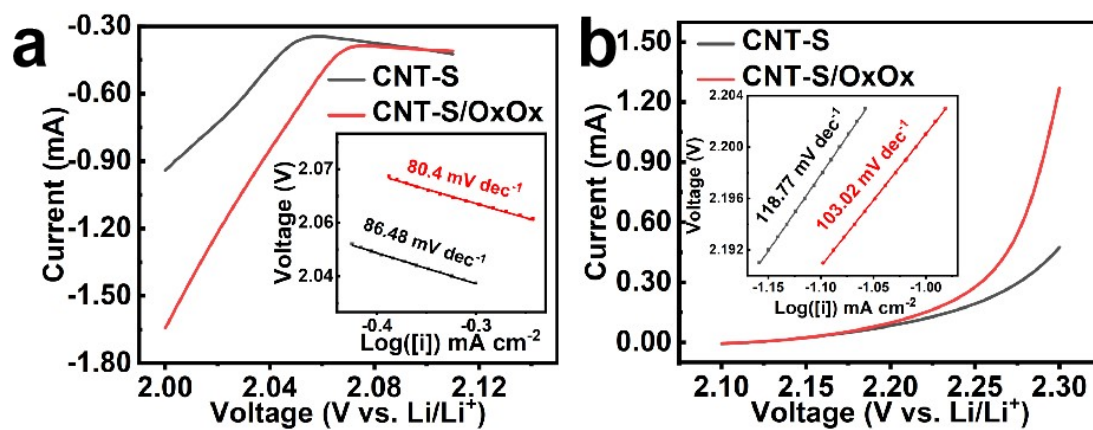

**Fig. S4** The Tafel slope of the anodic processes obtained from the CV curves in Fig. 1a correspond to (a) Peak ii and (b) Peak iii.

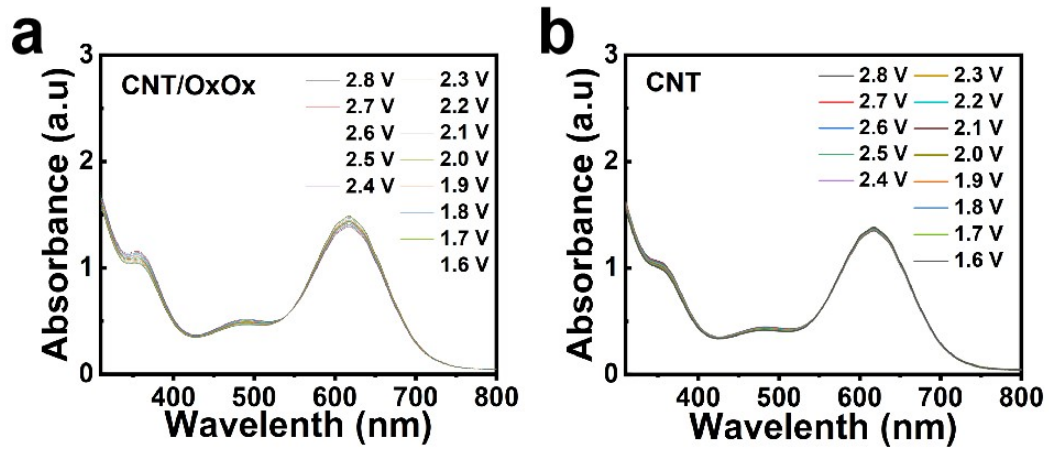

**Fig. S5** In situ UV-vis absorption spectra of (a) CNT-OxOx and (b) CNT cathodes in  $\text{Li}_2\text{S}_8$  and  $\text{Li}_2\text{S}_4$  solution during the discharging process.

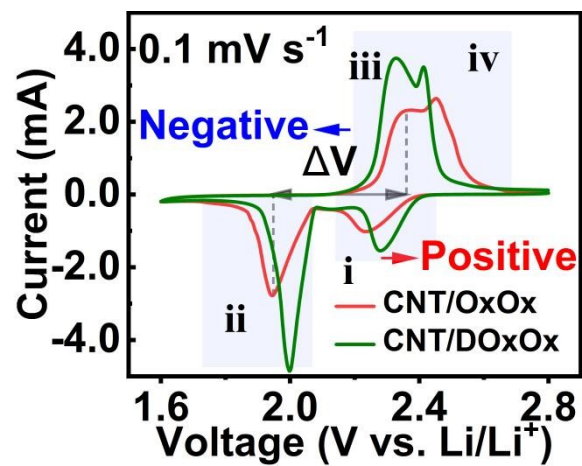

**Fig. S6** CV curves of cathodes modified with 60°C heat-treated OxOx and DOxOx at 0.1 mV s<sup>-1</sup>.

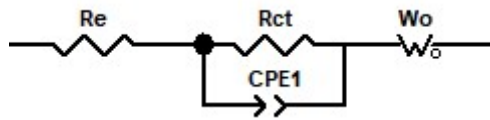

**Fig. S7** The equivalent circuit model based on the Nyquist plots.

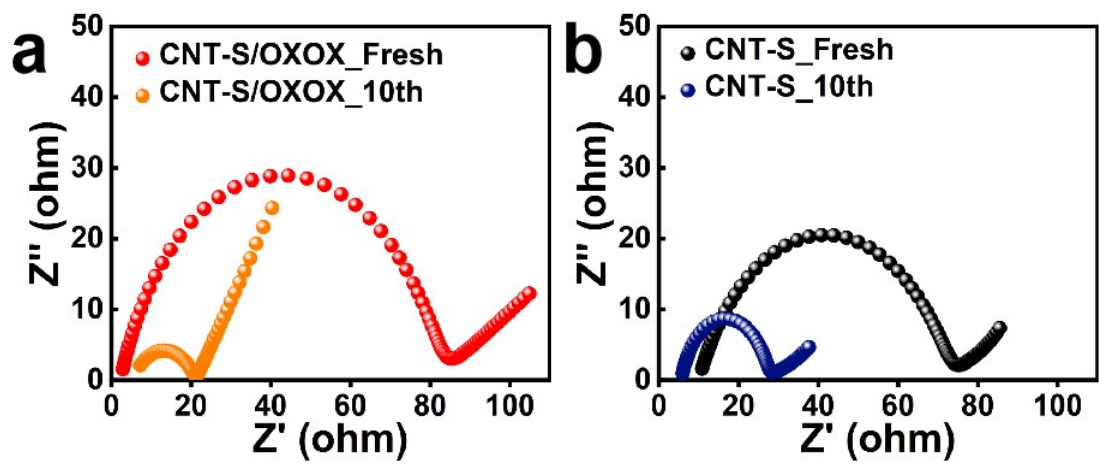

**Fig. S8** The Nyquist curves for (a) CNT-S and (b) CNT-OxOx electrodes before and after cycling for 10 cycles.

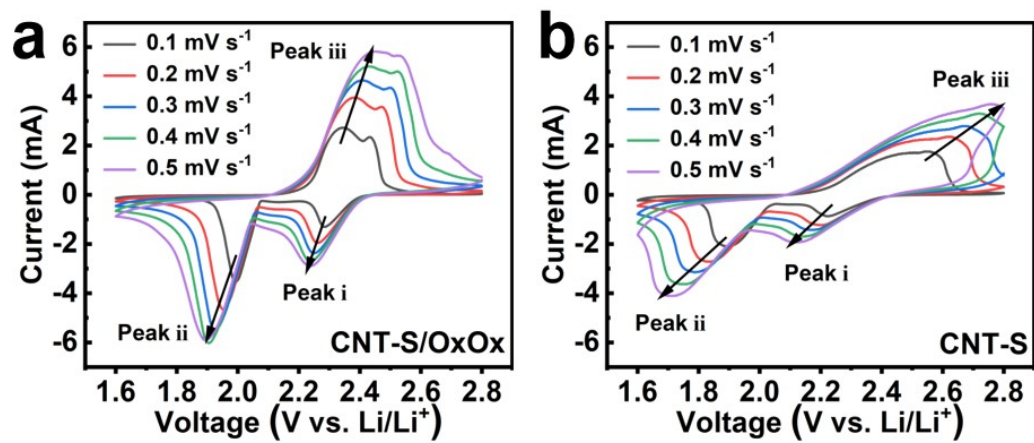

**Fig. S9** CV tests at different scan rates. CV curves with scanning rates ranging from 0.1 to 0.5 mV s<sup>-1</sup> using (a) CNT-S/OxOx, and (b) CNT-S cathodes.

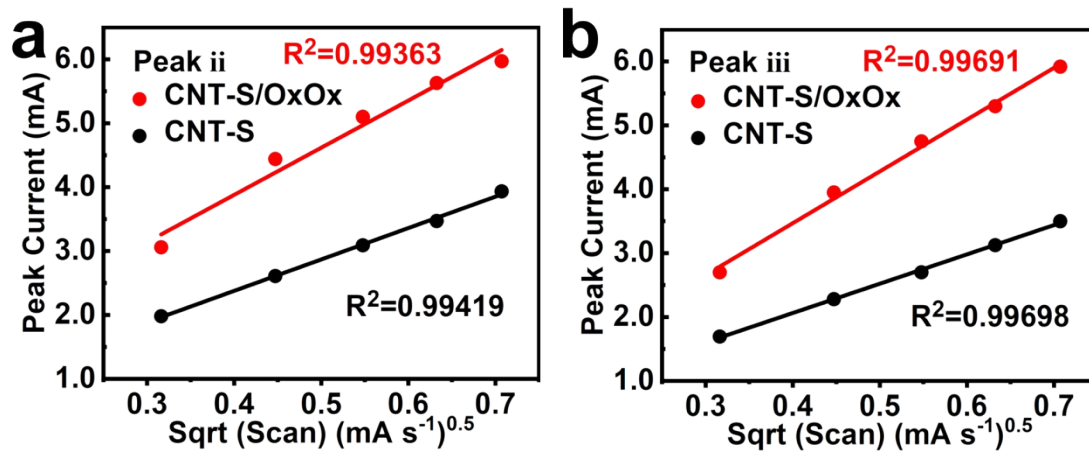

**Fig. S10** The  $I_p/v^{0.5}$  plot for (a) peak ii and (b) peak iii of CNT-S and CNT-S/OxOx derived from the CVs in Fig.S9.

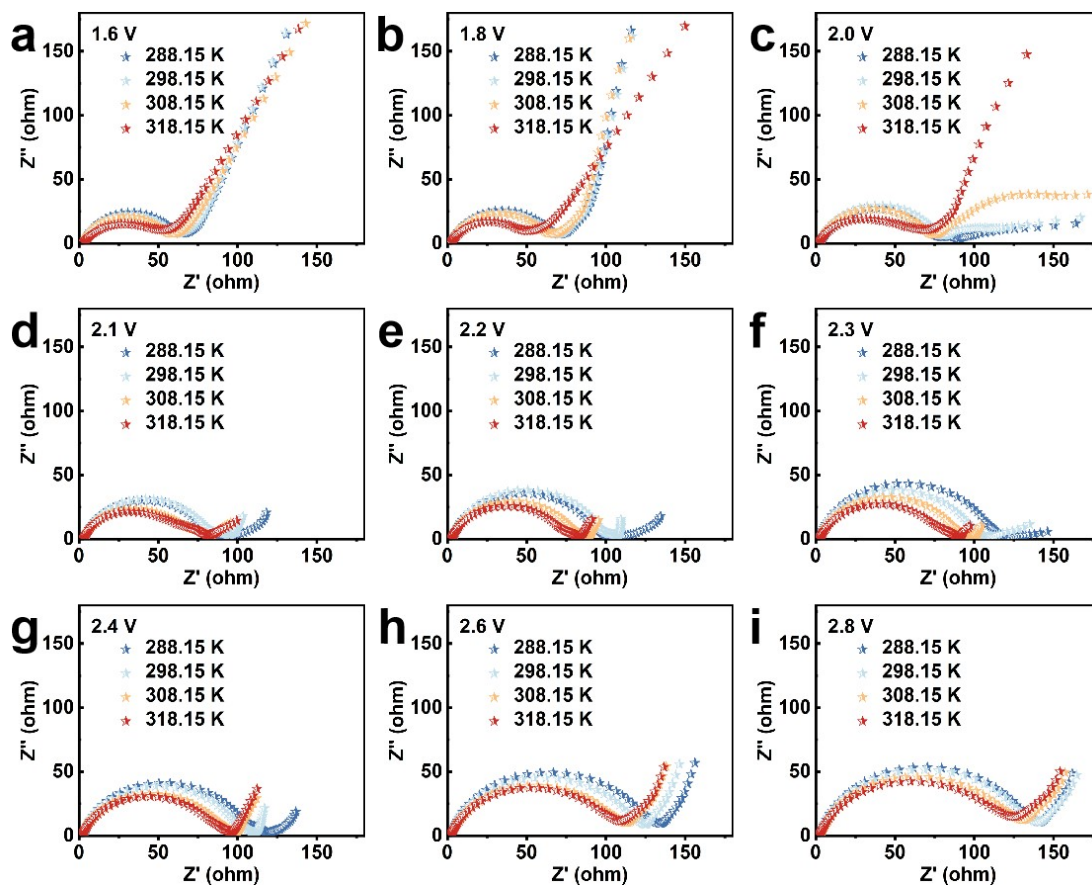

**Fig. S11** The Nyquist plots of the CNT-S electrode at different temperatures and voltages during discharge process.

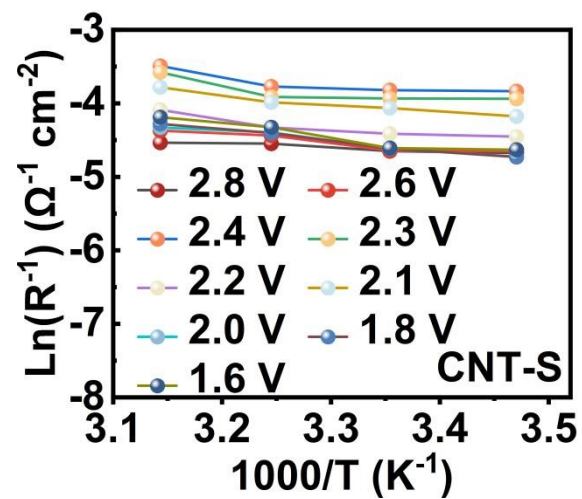

**Fig. S12** The corresponding Arrhenius plots of the CNT-S electrode.

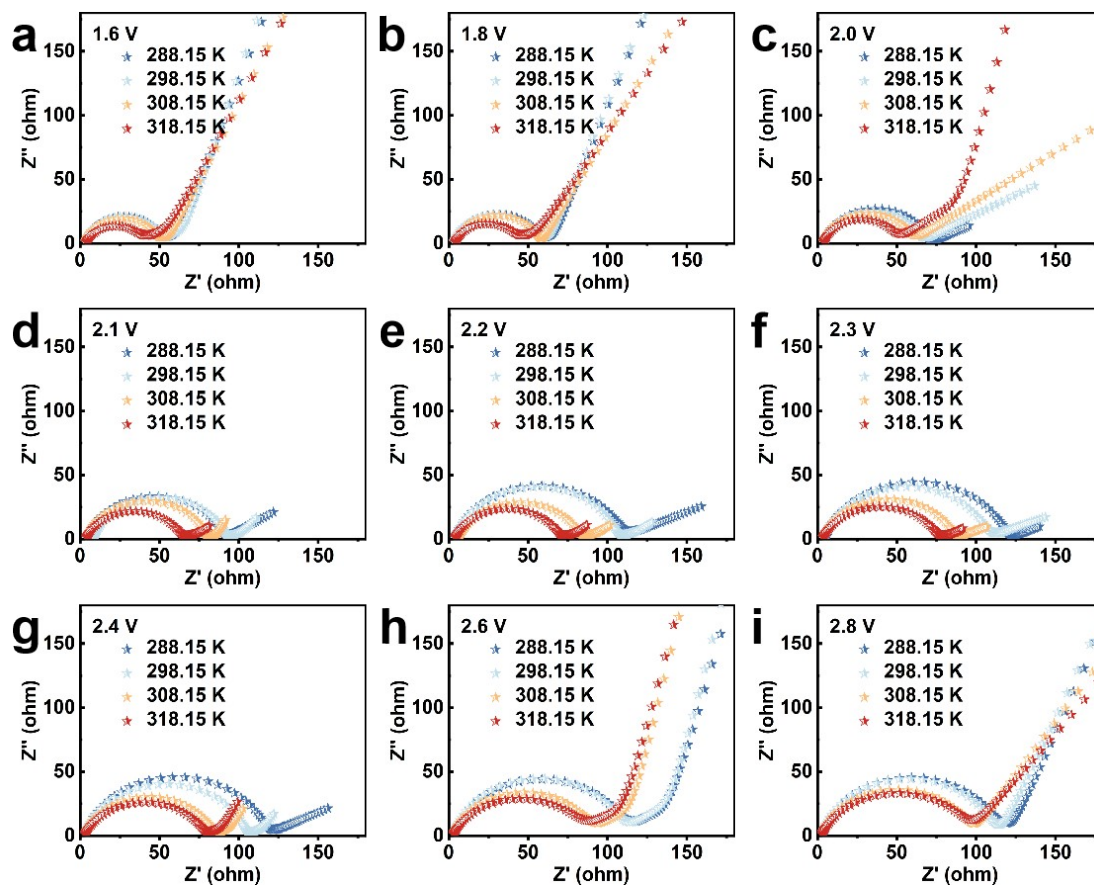

**Fig. S13** The Nyquist plots of the CNT-S/OxOx electrode at different temperatures and voltages during discharge process.

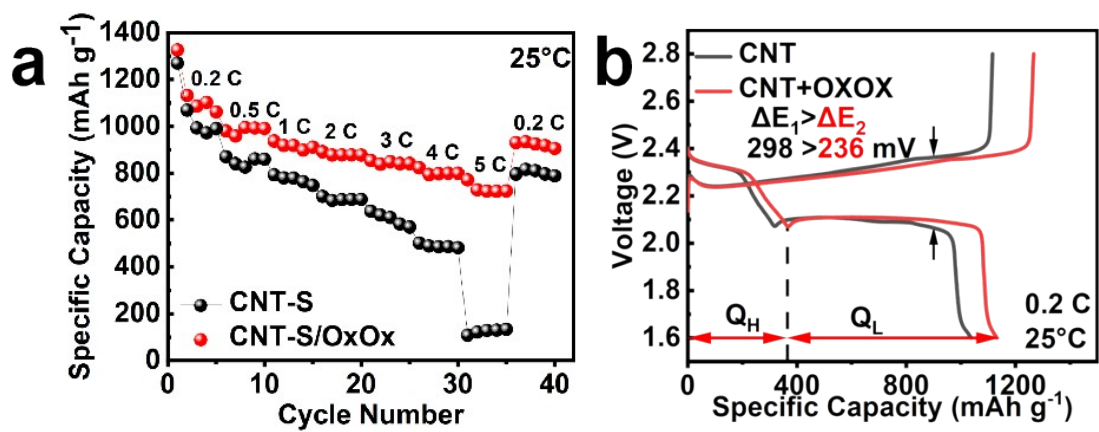

**Fig. S14** (a) Rate capabilities of CNT-S and CNT-S/OxOx cathodes at 25 °C. (b) The 2nd-cycle galvanostatic discharge–charge curves at 25°C and 0.2 C.

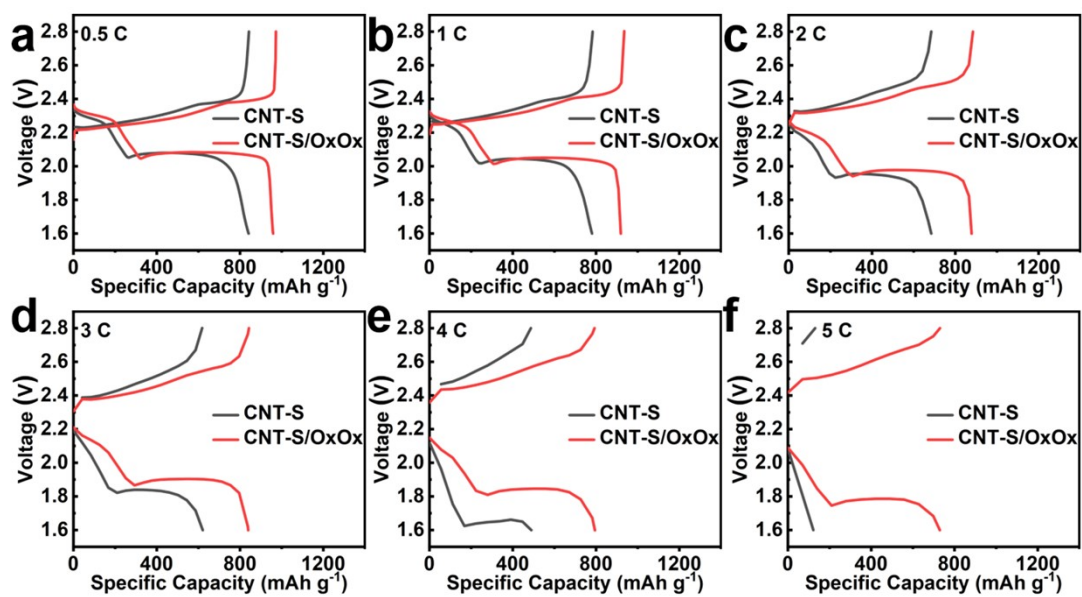

**Fig. S15** The first-cycle galvanostatic charge-discharge curves of CNT-S and CNT-S/OxOx cathodes at (a) 0.5 C, (b) 1 C, (c) 2 C, (d) 3 C, (e) 4 C and (f) 5 C.

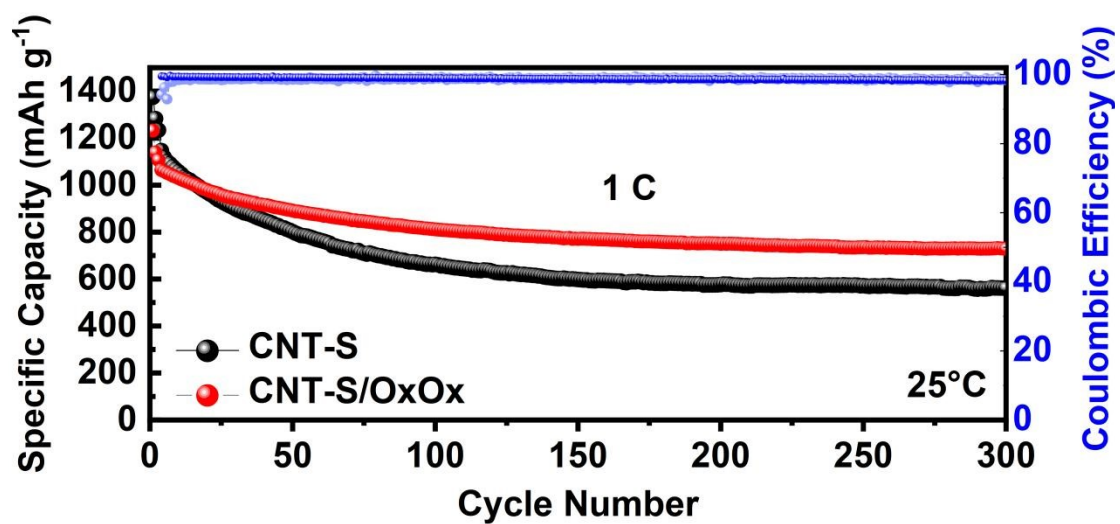

Fig. S16 Cycling performance of CNT-S and CNT-S/OxOx cathodes at 25°C and 1 C.

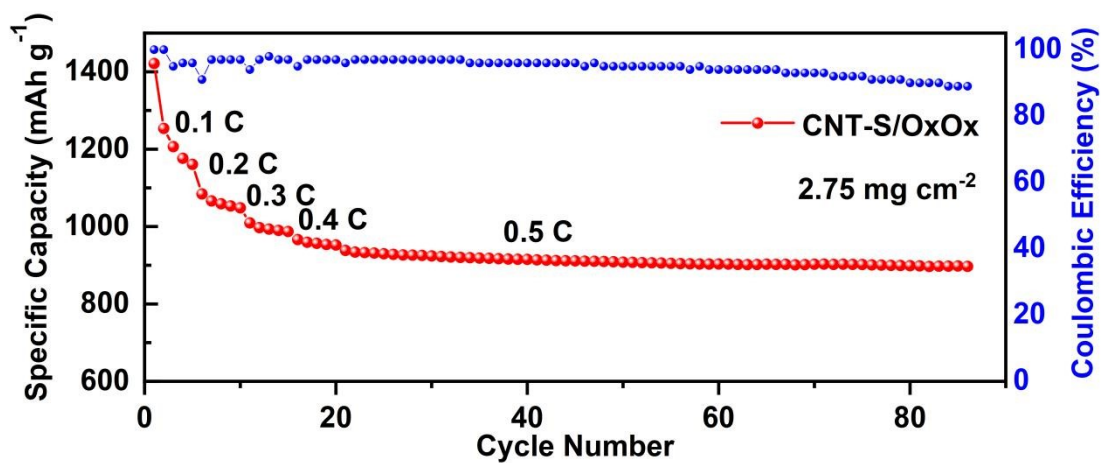

**Fig. S17** Rate cycling performance of the CNT-S/OxOx electrode with a sulfur areal loading of 2.75 mg cm<sup>-2</sup> at stepwise rates from 0.1 C to 0.5 C.

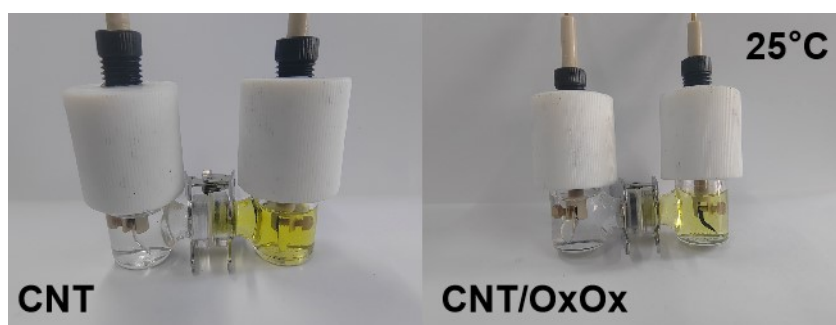

**Fig. S18** Digital images of different electrodes after 1 h of discharge in an H-type cell at 25°C.

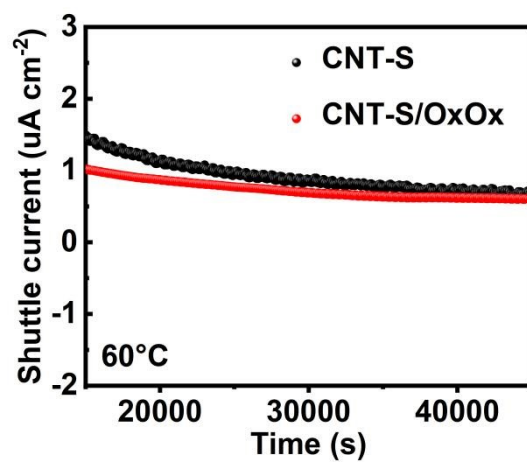

**Fig. S19** Shuttle currents of Li-S coin cells with different cathodes at 60°C.

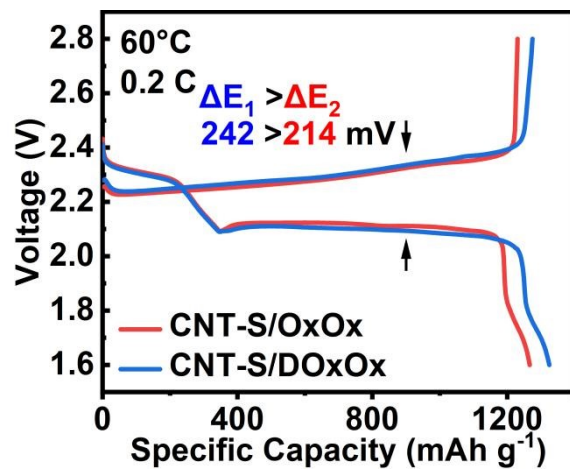

**Fig. S20** The 2nd-cycle galvanostatic discharge–charge curves of CNT-S/OxOx and CNT-S/DOxOx electrodes at 60°C and 0.2 C.

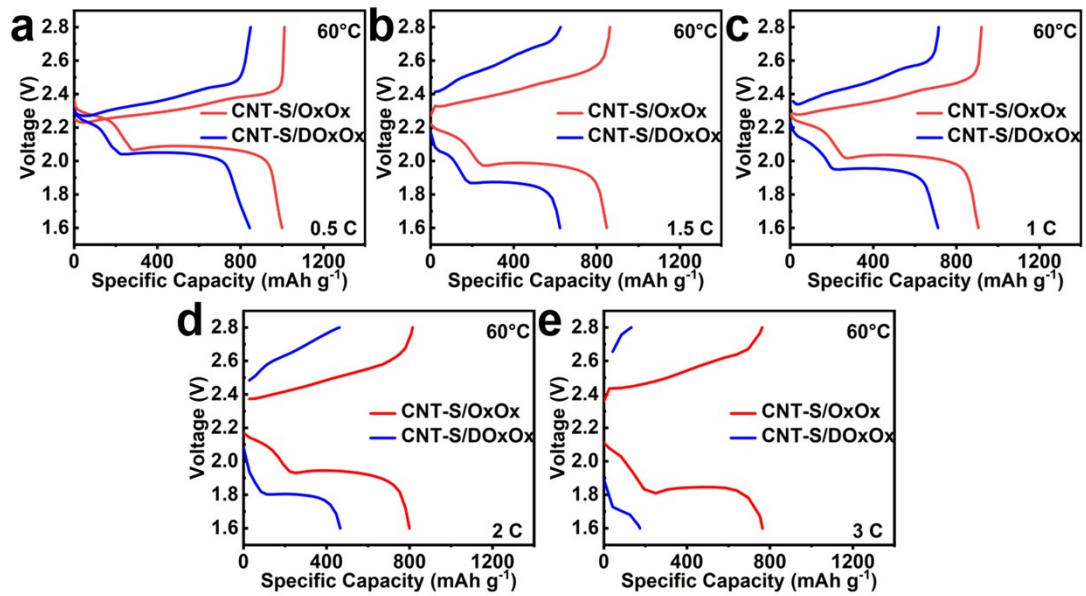

**Fig. S21** The first-cycle galvanostatic charge-discharge curves of CNT-S/OxOx and CNT-S/DOxOx cathodes at 60°C: (a) 0.5 C, (b) 1 C, (c) 1.5 C, (d) 2 C, and (e) 3 C.

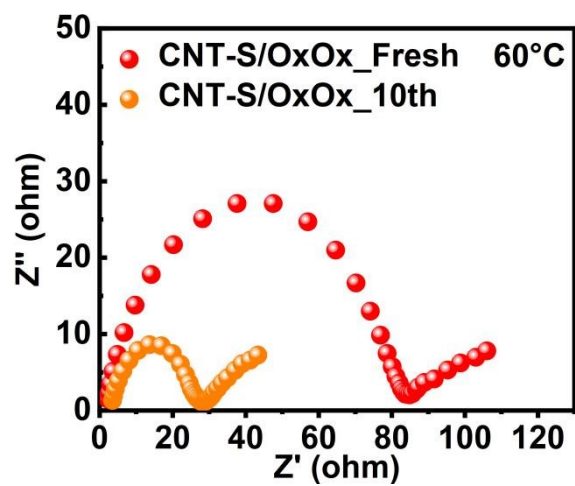

**Fig. S22** The Nyquist curves for CNT-OxOx electrode before and after cycling for 10 cycles at 60°C.

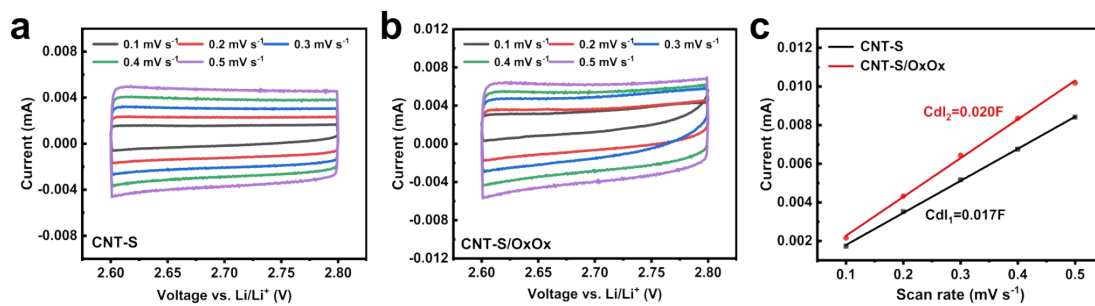

**Fig. S23** CV curves of the (a) CNT and (b) CNT/OxOx cathodes tested in the non-faradic range. (c) Plots showing the  $C_{dl}$  for the two cathodes.

**Table S1** Comparison of high-temperature electrochemical performance of Li-S batteries with different modification strategies.

| Material                                    | Initial rate capabilities [mAh g <sup>-1</sup> ] | Rate capability [C] | T [°C] | Cycle Number | Ref       |
|---------------------------------------------|--------------------------------------------------|---------------------|--------|--------------|-----------|
| W-VO <sub>2</sub> (R)                       | 1065.9                                           | 0.2                 | 50     | 120          | 1         |
| PPy/S/MWCNT                                 | 1000                                             | 0.5                 | 75     | 50           | 2         |
| C/S PAI                                     | 800                                              | 0.1                 | 60     | 50           | 3         |
| C/SnO <sub>2</sub> /S                       | 1161                                             | 1                   | 60     | 100          | 4         |
| RGO/hBN/S                                   | 132.48                                           | 1                   | 110    | 50           | 5         |
| Co <sub>3</sub> O <sub>4</sub> -350/PI/LLZO | 1500                                             | 0.1                 | 80     | 200          | 6         |
| CNT-S/O <sub>x</sub> O <sub>x</sub>         | 1064.68                                          | 1                   | 60     | 300          | This work |

## References:

1. G. Liu, Q. Zeng, S. Tian, X. Sun, D. Wang, Q. Wu, W. Wei, T. Wu, Y. Zhang and Y. Sheng, *Small*, 2024, **20**, 2307040.
2. M. Kazazi, *Ionics*, 2016, **22**, 1103–1112.
3. Y. Peng, Z. Peng, Y. Qiu, K. Yan and G. Wang, *Journal of Energy Storage*, 2020, **27**, 101104.
4. C. Wang, G. Wang, Q. Xiao, X. Yang, H. Yan, J. Qi, S. Liu, J. Wang and Y. Zhang, *Electrochim. Acta*, 2024, **487**, 10.
5. Y. Mussa, Z. Bayhan, N. Althubaiti, M. Arsalan and E. Alsharaeh, *Materials Chemistry and Physics*, 2021, **257**, 123807.
6. Z. Zhou, Y. Li, T. Fang, Y. Zhao, Q. Wang, J. Zhang and Z. Zhou, *Nanomaterials*, 2019, **9**, 1574.
